# Supplementary material for: A chelation enhanced selective fluorescence sensing of Hg2+ by a simple quinoline substituted tripodal amide receptor
Source: Royal Society of Chemistry journal article supplement (doi:10.1039/c1dt10923e), 2011-01-01
Supplement: c1dt10923e.pdf [file c1dt10923e.pdf]

# A chelation enhanced selective fluorescence sensing of Hg<sup>2+</sup> by a simple quinoline substituted tripodal amide receptor

B. Nisar Ahamed and Pradyut Ghosh\*

Department of Inorganic Chemistry, Indian Association for the Cultivation of Science,  
2A & 2B Raja S. C. Mullick Road, Kolkata 700032, India.

E-mail: [icpg@iacs.res.in](mailto:icpg@iacs.res.in)

## Table of Contents

| <b>Contents</b>                                                                   | <b>Page No</b> |
|-----------------------------------------------------------------------------------|----------------|
| 1. <sup>1</sup> H- NMR spectrum of <b>1</b> in CDCl <sub>3</sub> .....            | 1              |
| 2. <sup>13</sup> C- NMR spectrum of <b>1</b> in CDCl <sub>3</sub> .....           | 2              |
| 3. HRMS (ESI +ve) spectrum of <b>1</b> .....                                      | 3              |
| 4. <sup>1</sup> H- NMR spectrum of <b>2</b> in CDCl <sub>3</sub> .....            | 4              |
| 5. <sup>13</sup> C- NMR spectrum of <b>2</b> in CDCl <sub>3</sub> .....           | 5              |
| 6. HRMS (ESI +ve) spectrum of <b>2</b> .....                                      | 6              |
| 7. <sup>1</sup> H- NMR spectrum of <b>3</b> in DMSO- <i>d</i> <sub>6</sub> .....  | 7              |
| 8. <sup>13</sup> C- NMR spectrum of <b>3</b> in DMSO- <i>d</i> <sub>6</sub> ..... | 8              |
| 9. HRMS (ESI -ve) spectrum of <b>3</b> .....                                      | 9              |
| 10. IR-spectrum of <b>1</b> .....                                                 | 10             |
| 11. IR-spectrum of <b>3</b> .....                                                 | 11             |

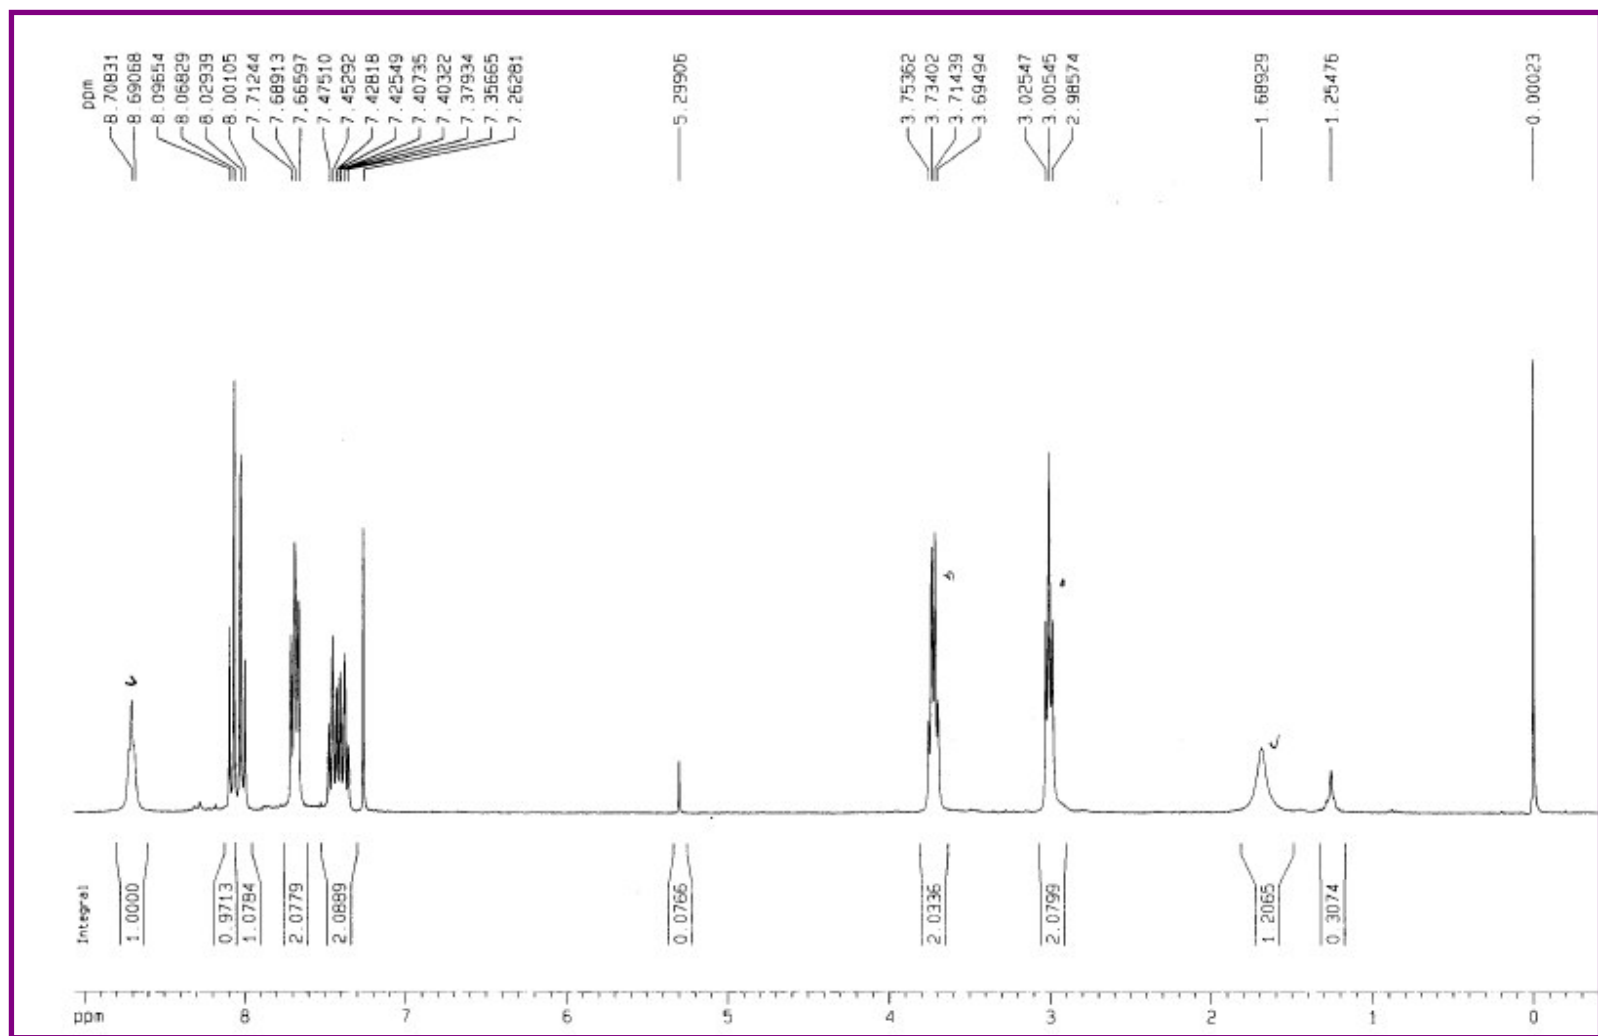

Figure S1.  $^1\text{H}$ -NMR spectrum of **1** in  $\text{CDCl}_3$

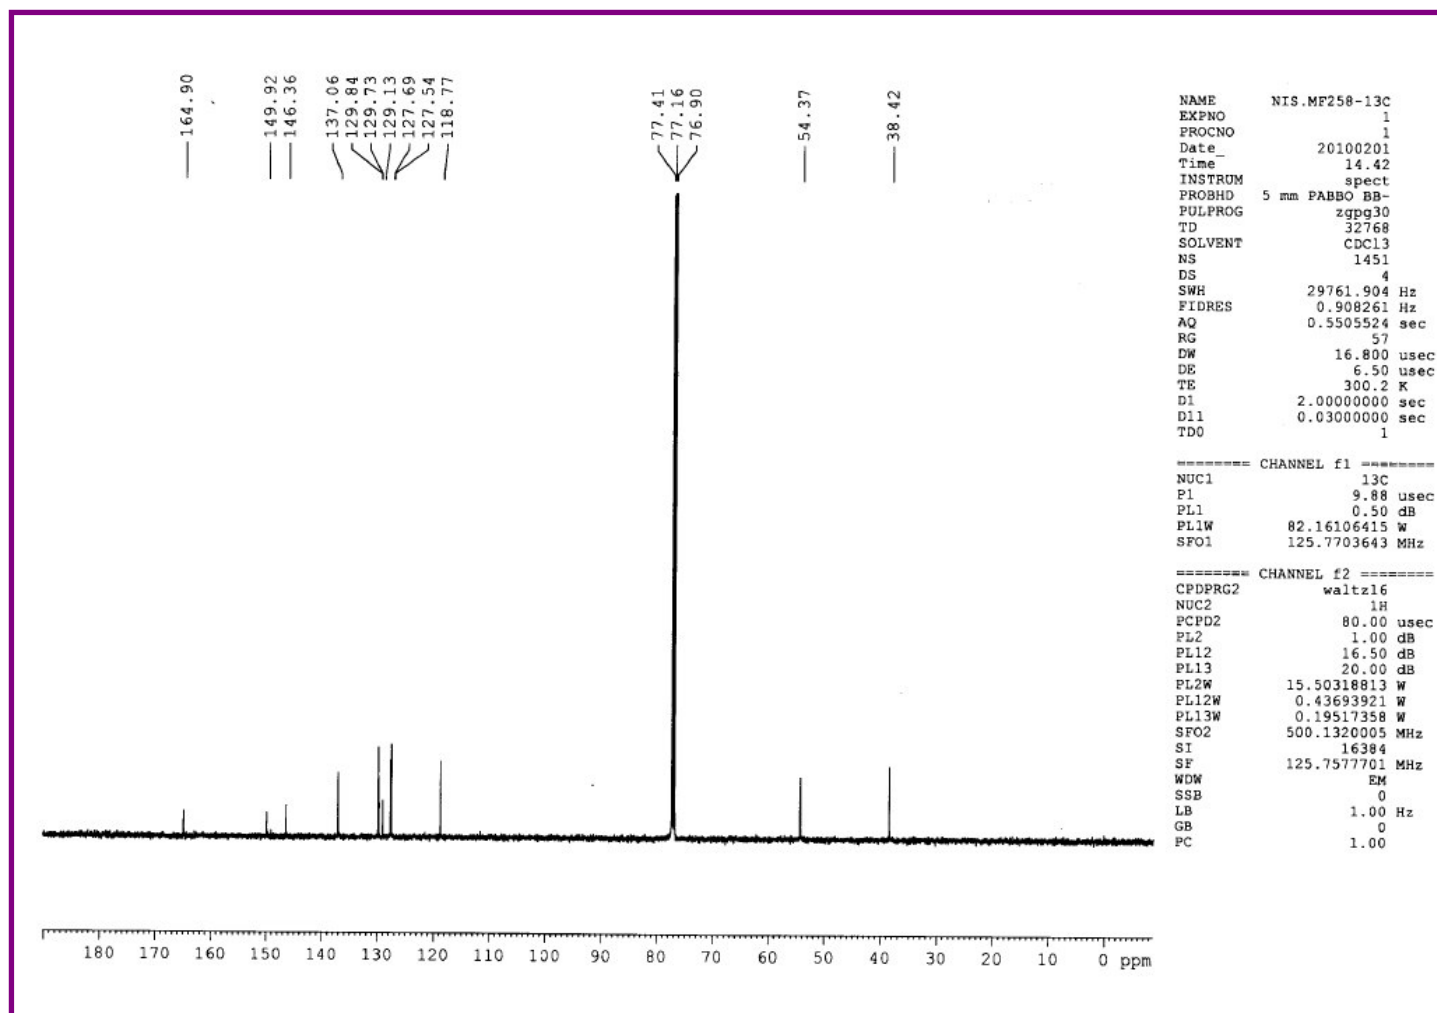

Figure S2.  $^{13}\text{C}$ -NMR spectrum of **1** in  $\text{CDCl}_3$

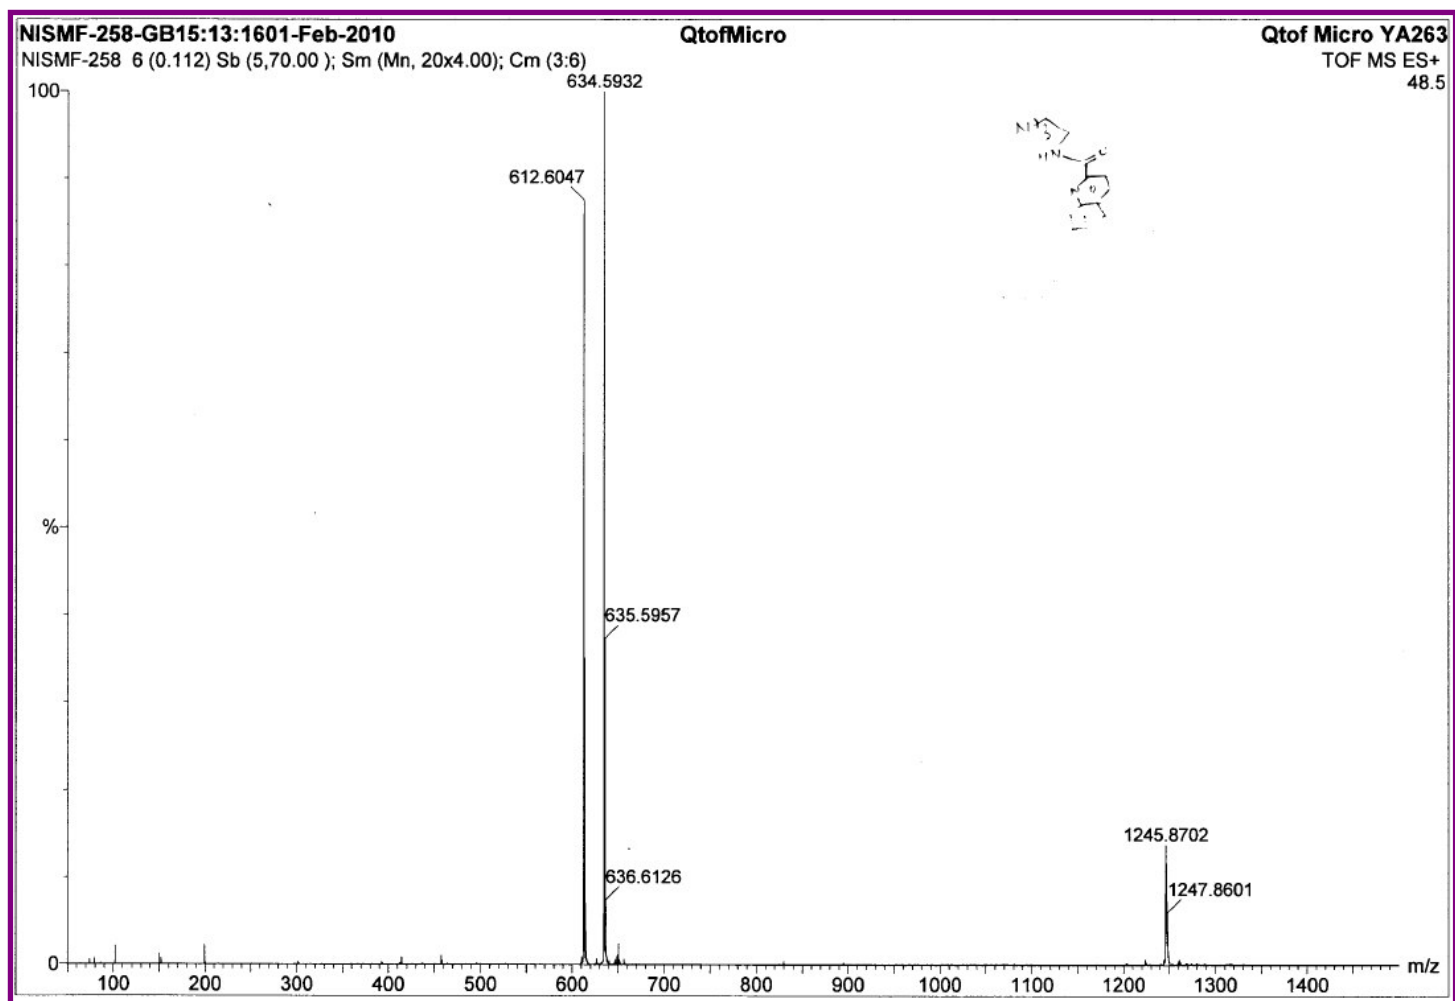

Figure S3. HRMS (ESI + ve) spectrum of **1**

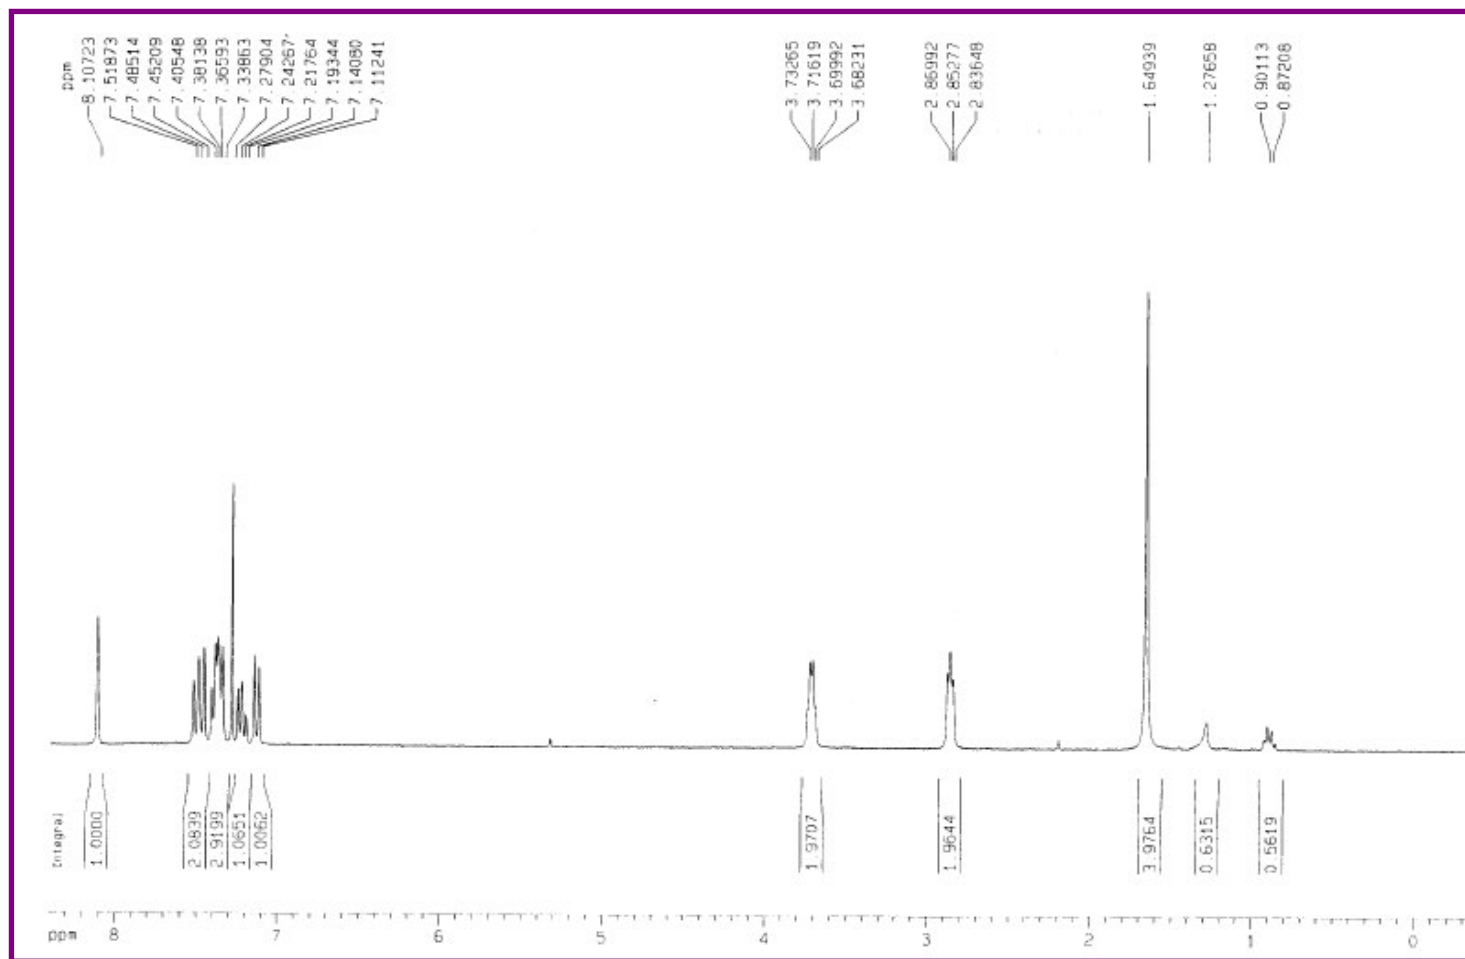

Figure S4. <sup>1</sup>H- NMR spectrum of **2** in CDCl<sub>3</sub>

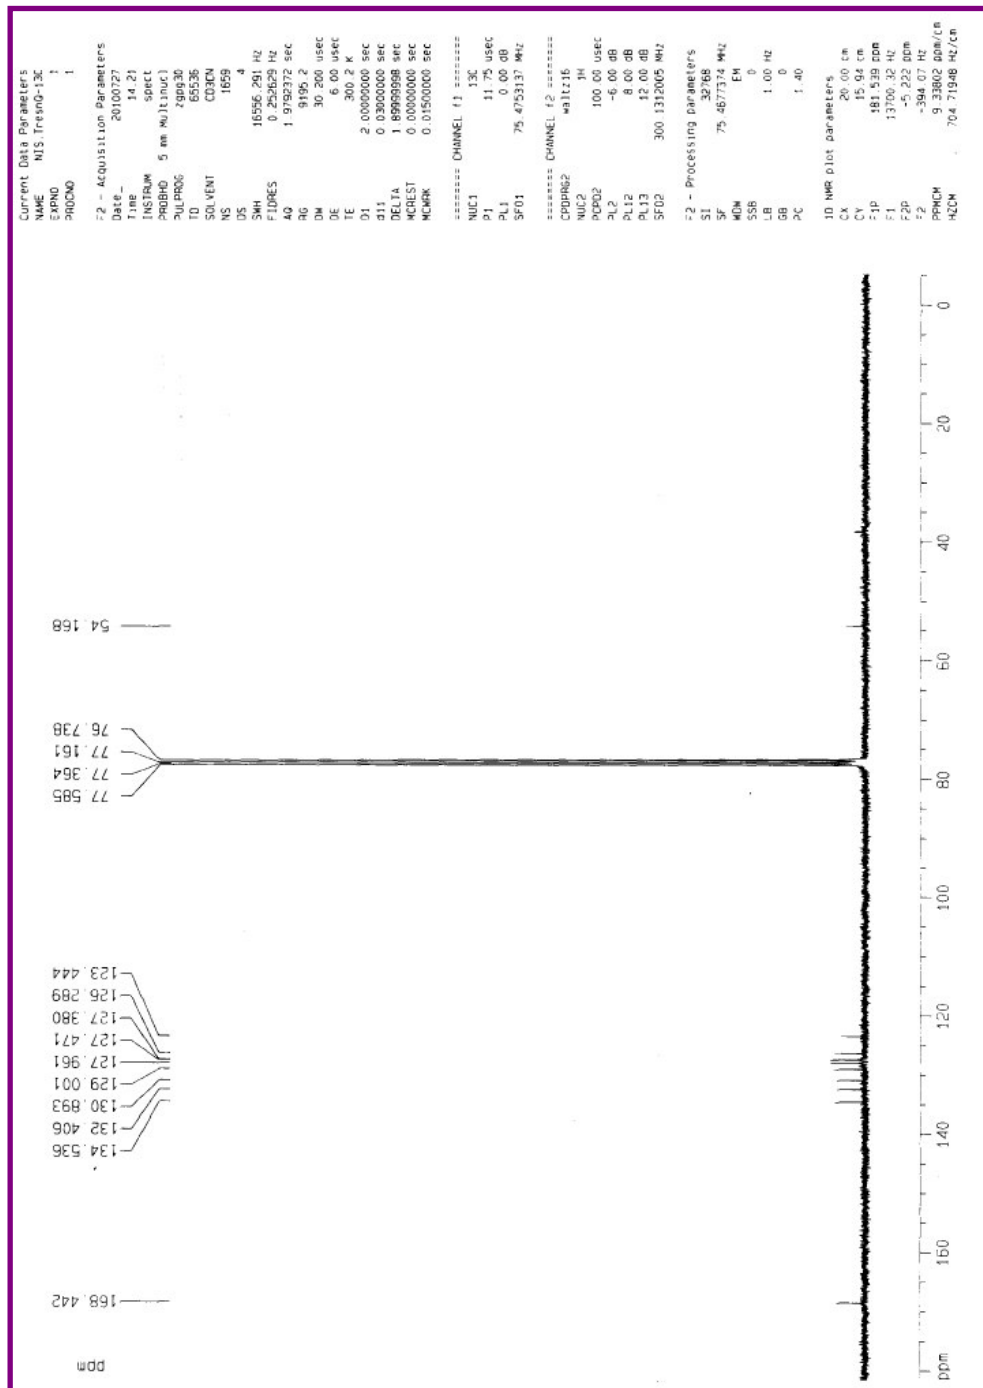

Figure S5. <sup>13</sup>C-NMR spectrum of 2 in CDCl<sub>3</sub>

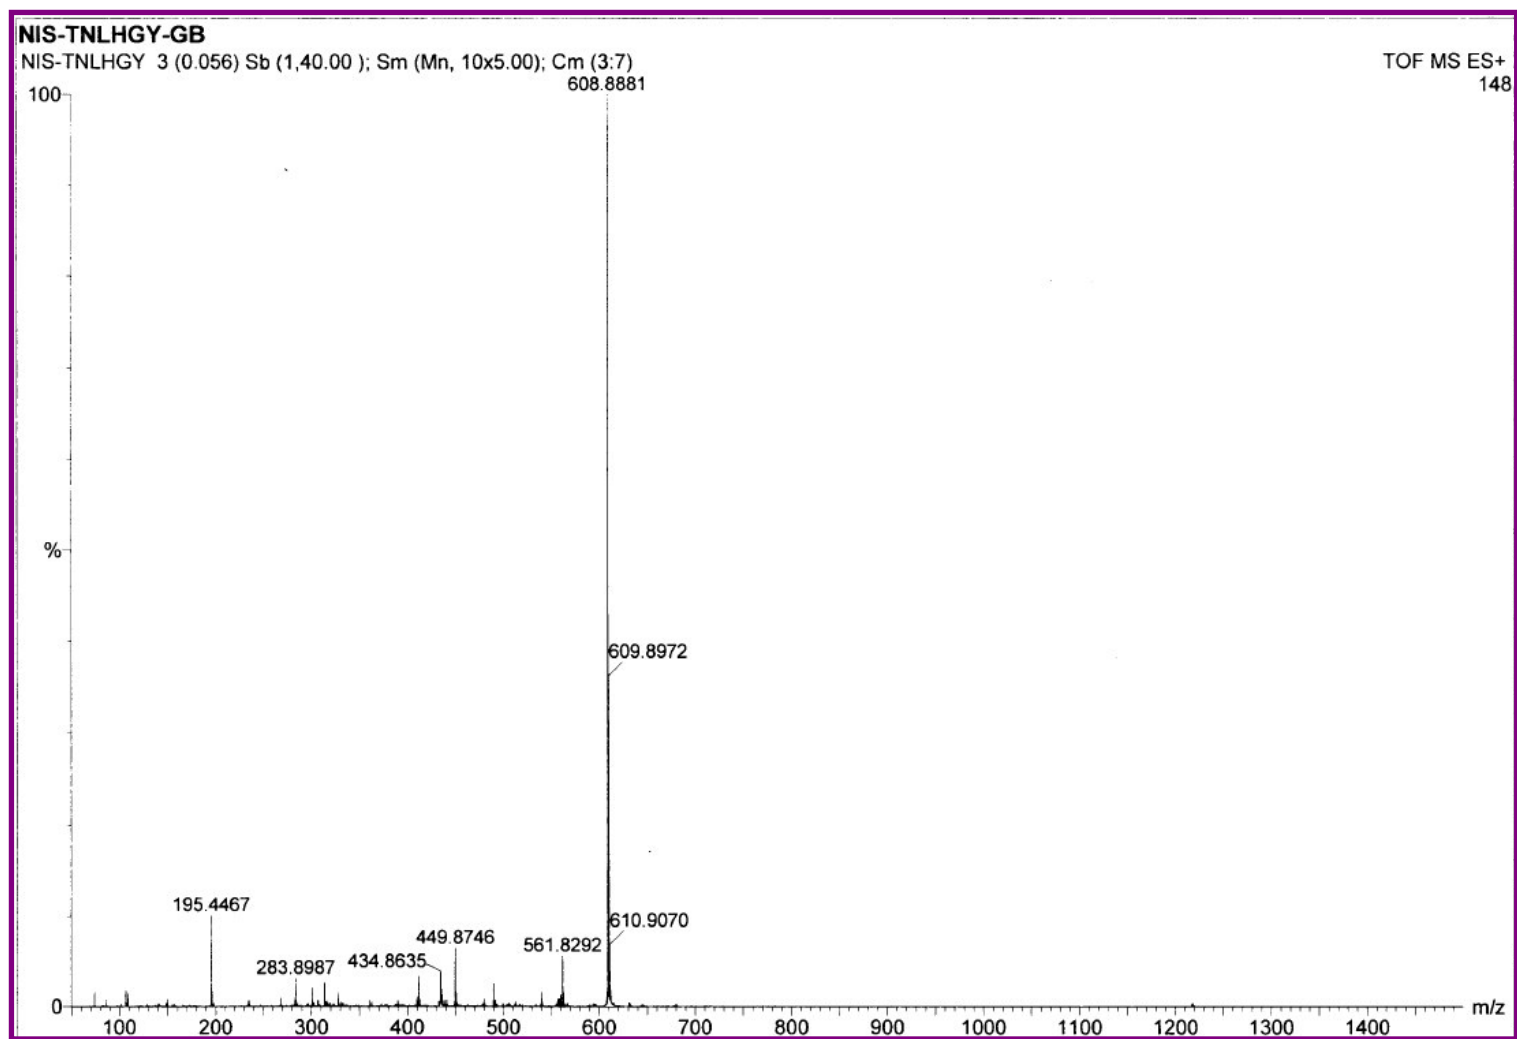

**Figure S6.** HRMS (ESI +ve) spectrum of **2**.

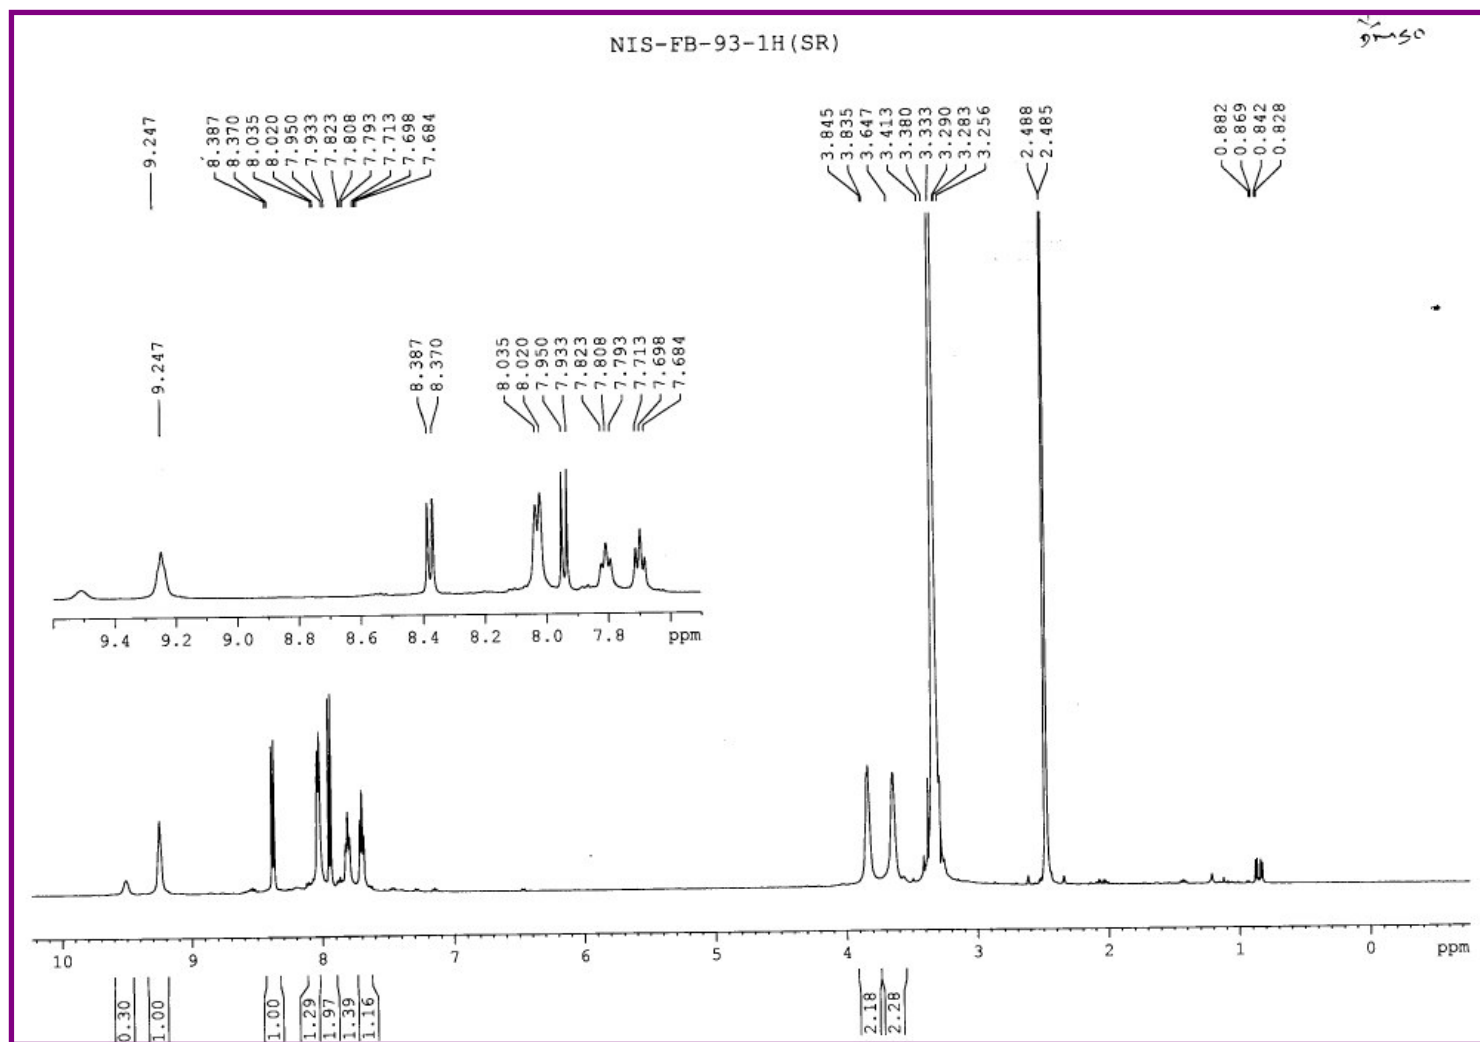

Figure S7.  $^1\text{H-NMR}$  spectrum of **3** in  $\text{DMSO-}d_6$



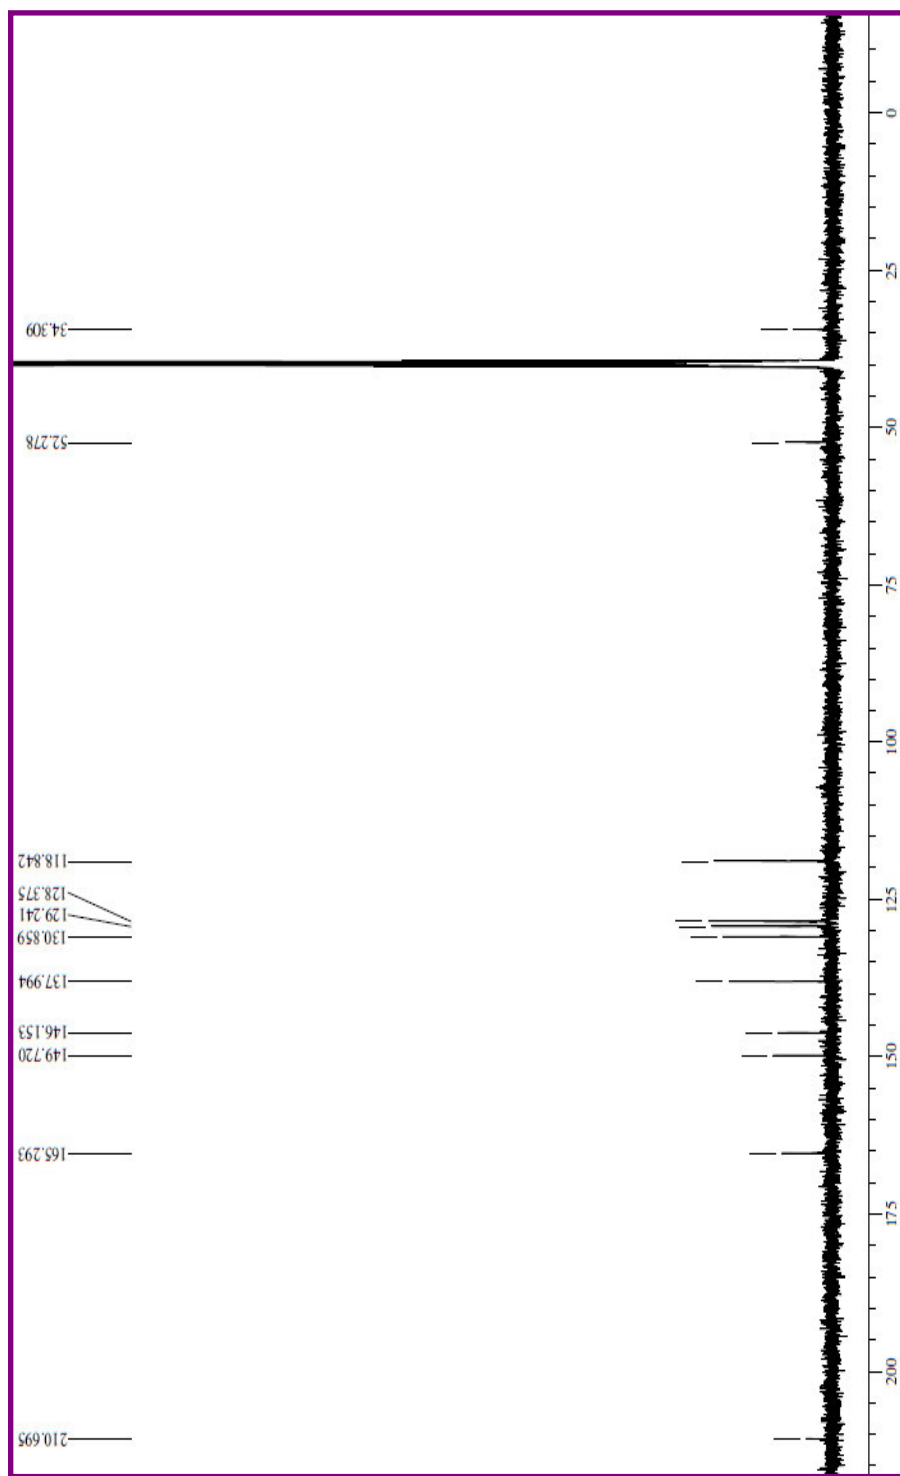

**Figure S8.**  $^{13}\text{C}$ -NMR spectrum of **3** in  $\text{DMSO-}d_6$

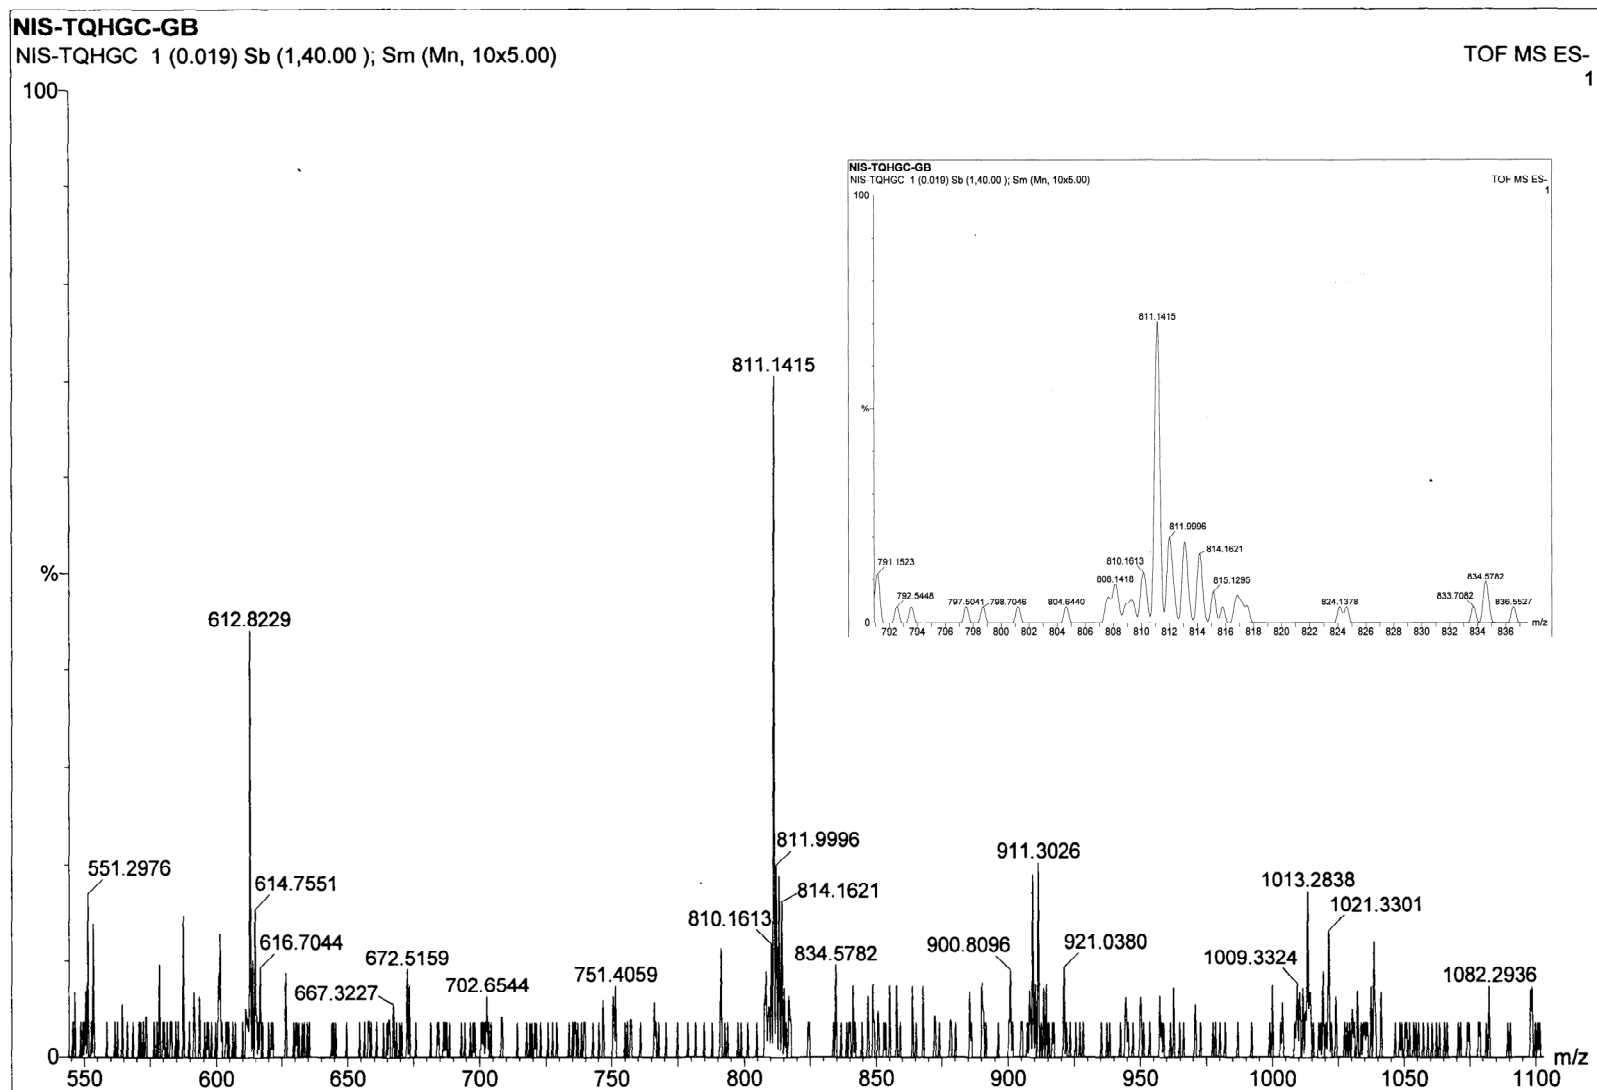

**Figure S9.** HRMS (ESI -ve) spectrum of **3**, Inset shows the expanded spectrum of **3**.

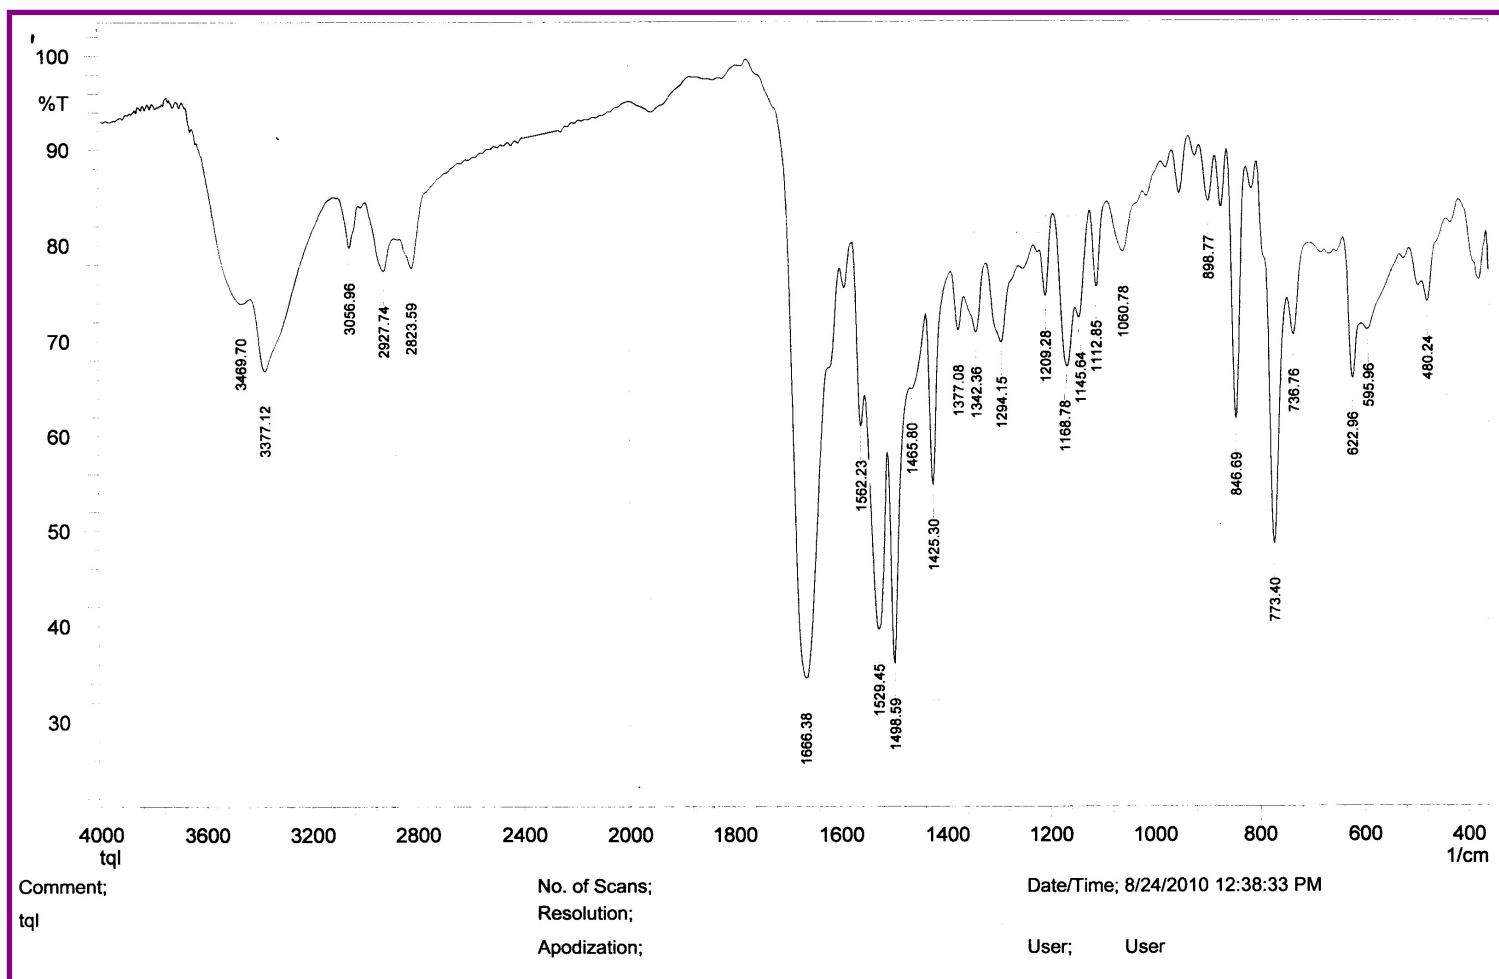

Figure S10. Infra red spectrum of 1.

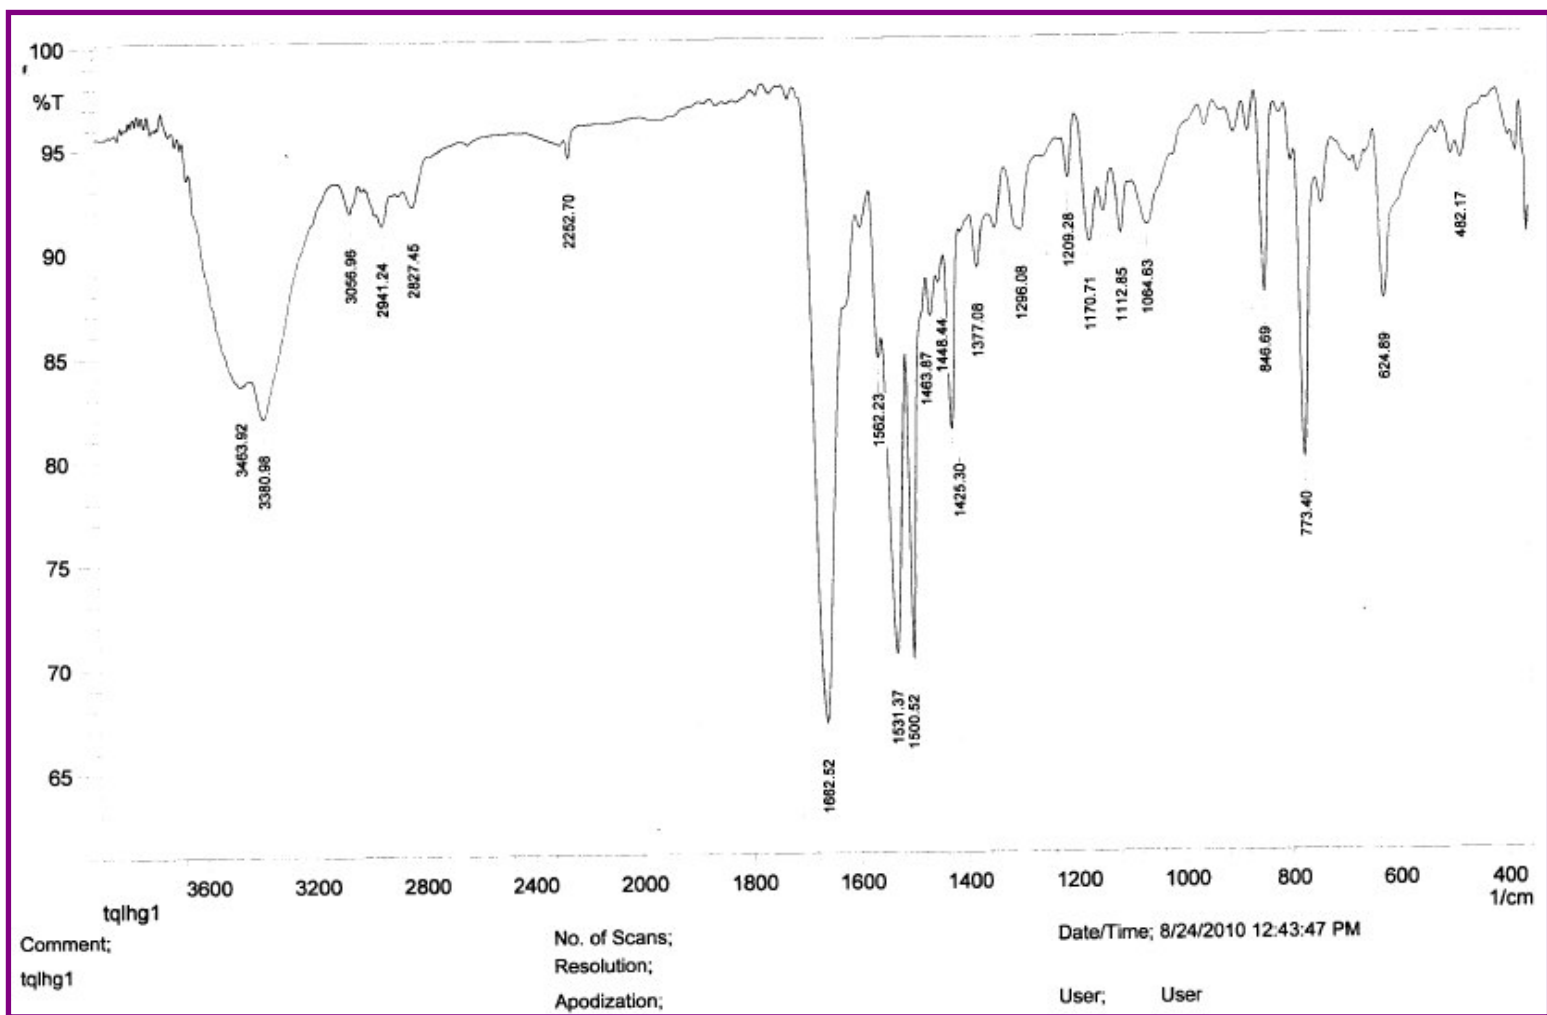

Figure S11. Infra-red spectrum of 3.
